# Supplementary material for: Infrared absorption spectra of 2-(hydroxyimino)propanohydroxamic and oxalodihydroxamic acids isolated in argon matrices
Source: Royal Society of Chemistry journal article supplement (doi:10.1039/b302498a), 2003-01-01
Supplement: b302498aesi.pdf [file b302498aesi.pdf]

Supplementary data to the manuscript "Infrared Absorption Spectra of 2-(Hydroxyimino)propanohydroxamic and Oxalodihydroxamic Acids Isolated in Argon Matrices" by A. Kaczor, J.Szczepanski, M. Vala, H. Kozłowski and L. Proniewicz

Geometry (Bond Lengths in Å, Angles in °) of the two most stable **hpha** structures.

| Parameter                                       | zEe-keto <sup>a</sup> | zEe-keto <sup>b</sup> | zEz-keto <sup>a</sup> |
|-------------------------------------------------|-----------------------|-----------------------|-----------------------|
| C <sub>1</sub> -C <sub>2</sub>                  | 1.501                 | 1.493                 | 1.506                 |
| C <sub>1</sub> -C <sub>6</sub>                  | 1.498                 | 1.492                 | 1.504                 |
| C <sub>1</sub> -N <sub>7</sub>                  | 1.285                 | 1.296                 | 1.286                 |
| C <sub>2</sub> -N <sub>4</sub>                  | 1.361                 | 1.364                 | 1.354                 |
| C <sub>2</sub> -O <sub>3</sub>                  | 1.234                 | 1.240                 | 1.239                 |
| C <sub>6</sub> -H <sub>11</sub>                 | 1.095                 | 1.094                 | 1.092                 |
| C <sub>6</sub> -H <sub>12</sub>                 | 1.090                 | 1.089                 | 1.095                 |
| C <sub>6</sub> -H <sub>13</sub>                 | 1.096                 | 1.094                 | 1.095                 |
| N <sub>4</sub> -H <sub>9</sub>                  | 1.013                 | 1.016                 | 1.011                 |
| N <sub>4</sub> -O <sub>5</sub>                  | 1.402                 | 1.412                 | 1.394                 |
| N <sub>7</sub> -O <sub>8</sub>                  | 1.392                 | 1.400                 | 1.407                 |
| O <sub>5</sub> -H <sub>10</sub>                 | 0.985                 | 0.987                 | 0.987                 |
| O <sub>8</sub> -H <sub>14</sub>                 | 0.971                 | 0.975                 | 0.970                 |
| O <sub>3</sub> ⋯H <sub>10</sub>                 | 2.000                 | 2.008                 | 1.961                 |
| C <sub>1</sub> -C <sub>2</sub> -O <sub>3</sub>  | 122.9                 | 122.9                 | 122.8                 |
| C <sub>1</sub> -C <sub>6</sub> -H <sub>11</sub> | 110.3                 | 109.9                 | 109.9                 |
| C <sub>1</sub> -C <sub>6</sub> -H <sub>12</sub> | 109.8                 | 109.7                 | 110.4                 |
| C <sub>1</sub> -C <sub>6</sub> -H <sub>13</sub> | 110.2                 | 109.9                 | 110.4                 |
| C <sub>1</sub> -N <sub>7</sub> -O <sub>8</sub>  | 111.9                 | 110.7                 | 114.3                 |
| C <sub>2</sub> -N <sub>4</sub> -H <sub>9</sub>  | 120.2                 | 118.7                 | 123.6                 |
| C <sub>2</sub> -N <sub>4</sub> -O <sub>5</sub>  | 115.8                 | 114.9                 | 116.2                 |
| C <sub>6</sub> -C <sub>1</sub> -N <sub>7</sub>  | 126.0                 | 125.5                 | 129.1                 |
| N <sub>4</sub> -O <sub>5</sub> -H <sub>10</sub> | 100.8                 | 100.6                 | 100.6                 |

|                                                                 |        |        |        |
|-----------------------------------------------------------------|--------|--------|--------|
| N <sub>7</sub> -O <sub>8</sub> -H <sub>14</sub>                 | 102.8  | 102.2  | 102.4  |
| O <sub>3</sub> -C <sub>2</sub> -N <sub>4</sub>                  | 120.6  | 121.1  | 119.7  |
| O <sub>3</sub> ⋯H <sub>10</sub> -O <sub>5</sub>                 | 119.1  | 119.3  | 119.8  |
| C <sub>1</sub> -C <sub>2</sub> -N <sub>4</sub> -H <sub>9</sub>  | -27.5  | -31.5  | -23.4  |
| C <sub>1</sub> -N <sub>7</sub> -O <sub>8</sub> -H <sub>14</sub> | -178.7 | -178.7 | 179.0  |
| C <sub>2</sub> -C <sub>1</sub> -C <sub>6</sub> -H <sub>11</sub> | -125.8 | -122.8 | -179.0 |
| C <sub>2</sub> -C <sub>1</sub> -C <sub>6</sub> -H <sub>12</sub> | -4.5   | -1.8   | -57.8  |
| C <sub>2</sub> -C <sub>1</sub> -C <sub>6</sub> -H <sub>13</sub> | 116.4  | 119.4  | 59.9   |
| C <sub>2</sub> -C <sub>1</sub> -N <sub>7</sub> -O <sub>8</sub>  | 179.5  | 179.1  | -1.4   |
| C <sub>2</sub> -N <sub>4</sub> -O <sub>5</sub> -H <sub>10</sub> | -10.9  | -13.8  | -6.6   |
| O <sub>3</sub> -C <sub>2</sub> -C <sub>1</sub> -N <sub>7</sub>  | -166.1 | -160.4 | -172.0 |
| O <sub>3</sub> -C <sub>2</sub> -N <sub>4</sub> -O <sub>5</sub>  | 15.5   | 18.1   | 9.7    |
| C <sub>2</sub> -O <sub>3</sub> ⋯H <sub>10</sub> -O <sub>5</sub> | 2.4    | -179.0 | 1.5    |

<sup>a</sup> B3LYP/6-31G(d), <sup>b</sup> MP2/6-31G(d)

Geometry (Bond Lengths in Å, Angles in °) of the two most stable **oxha** structures.

| Parameter                                      | zEz-keto <sup>a</sup> | zEz-keto <sup>b</sup> | eEz-keto <sup>a</sup> |
|------------------------------------------------|-----------------------|-----------------------|-----------------------|
| C <sub>2</sub> -C <sub>3</sub>                 | 1.515                 | 1.508                 | 1.522                 |
| C <sub>2</sub> -N <sub>5</sub>                 | 1.340                 | 1.340                 | 1.346                 |
| C <sub>3</sub> -N <sub>9</sub>                 | 1.340                 | 1.340                 | 1.330                 |
| C <sub>2</sub> -O <sub>1</sub>                 | 1.236                 | 1.244                 | 1.233                 |
| C <sub>3</sub> -O <sub>4</sub>                 | 1.236                 | 1.244                 | 1.249                 |
| N <sub>5</sub> -H <sub>12</sub>                | 1.011                 | 1.014                 | 1.012                 |
| N <sub>9</sub> -H <sub>8</sub>                 | 1.011                 | 1.014                 | 1.011                 |
| N <sub>5</sub> -O <sub>6</sub>                 | 1.388                 | 1.396                 | 1.397                 |
| N <sub>9</sub> -O <sub>10</sub>                | 1.388                 | 1.396                 | 1.383                 |
| O <sub>6</sub> -H <sub>7</sub>                 | 0.984                 | 0.987                 | 0.992                 |
| O <sub>10</sub> -H <sub>11</sub>               | 0.984                 | 0.987                 | 0.984                 |
| O <sub>1</sub> ⋯H <sub>7</sub>                 | 2.088                 | 2.087                 | 3.684                 |
| O <sub>4</sub> ⋯H <sub>11</sub>                | 2.088                 | 2.087                 | 2.093                 |
| C <sub>2</sub> -C <sub>3</sub> -N <sub>9</sub> | 112.8                 | 112.6                 | 112.2                 |

|                                                                  |        |        |        |
|------------------------------------------------------------------|--------|--------|--------|
| C <sub>3</sub> -C <sub>2</sub> -N <sub>5</sub>                   | 112.8  | 112.6  | 115.3  |
| C <sub>2</sub> -C <sub>3</sub> -O <sub>4</sub>                   | 124.3  | 124.2  | 126.1  |
| C <sub>3</sub> -C <sub>2</sub> -O <sub>1</sub>                   | 124.3  | 124.2  | 120.7  |
| C <sub>2</sub> -N <sub>5</sub> -H <sub>12</sub>                  | 123.9  | 123.0  | 119.7  |
| C <sub>3</sub> -N <sub>9</sub> -H <sub>8</sub>                   | 123.9  | 123.0  | 124.0  |
| C <sub>2</sub> -N <sub>5</sub> -O <sub>6</sub>                   | 118.4  | 117.8  | 127.6  |
| C <sub>3</sub> -N <sub>9</sub> -O <sub>10</sub>                  | 118.4  | 117.8  | 119.8  |
| N <sub>5</sub> -C <sub>2</sub> -O <sub>1</sub>                   | 122.9  | 123.2  | 123.9  |
| N <sub>9</sub> -C <sub>3</sub> -O <sub>4</sub>                   | 122.9  | 123.2  | 121.7  |
| N <sub>5</sub> -O <sub>6</sub> -H <sub>7</sub>                   | 101.3  | 101.1  | 103.3  |
| N <sub>9</sub> -O <sub>10</sub> -H <sub>11</sub>                 | 101.3  | 101.1  | 101.7  |
| O <sub>6</sub> -N <sub>5</sub> -H <sub>12</sub>                  | 114.5  | 113.7  | 112.0  |
| O <sub>10</sub> -N <sub>9</sub> -H <sub>8</sub>                  | 114.5  | 113.7  | 115.9  |
| O <sub>1</sub> ⋯H <sub>7</sub> -O <sub>6</sub>                   | 117.0  | 117.6  | 76.6   |
| O <sub>4</sub> ⋯H <sub>11</sub> -O <sub>10</sub>                 | 117.0  | 117.6  | 116.3  |
| C <sub>2</sub> -C <sub>3</sub> -N <sub>9</sub> -O <sub>10</sub>  | 173.0  | 171.4  | 177.9  |
| C <sub>3</sub> -C <sub>2</sub> -N <sub>5</sub> -O <sub>6</sub>   | 173.0  | 171.4  | -7.4   |
| C <sub>2</sub> -N <sub>5</sub> -O <sub>6</sub> -H <sub>7</sub>   | 5.8    | 8.3    | 11.7   |
| C <sub>3</sub> -N <sub>9</sub> -O <sub>10</sub> -H <sub>11</sub> | 5.8    | 8.3    | 1.4    |
| O <sub>1</sub> -C <sub>2</sub> -C <sub>3</sub> -O <sub>4</sub>   | 173.5  | 170.6  | 177.3  |
| O <sub>1</sub> -C <sub>2</sub> -N <sub>5</sub> -H <sub>12</sub>  | -166.8 | -163.0 | 4.4    |
| O <sub>4</sub> -C <sub>3</sub> -N <sub>9</sub> -H <sub>8</sub>   | -166.8 | -163.0 | -176.0 |
| C <sub>2</sub> -O <sub>1</sub> ⋯H <sub>7</sub> -O <sub>6</sub>   | 179.3  | 179.6  | 177.7  |
| C <sub>3</sub> -O <sub>4</sub> ⋯H <sub>11</sub> -O <sub>10</sub> | 179.3  | 179.6  | 179.5  |

<sup>a</sup> B3LYP/6-31G(d), <sup>b</sup> MP2/6-31G(d)
